# Supplementary material for: Haemolysis Detection in MicroRNA-Seq from Clinical Plasma Samples
Source: MDPI journal article supplement (doi:10.3390/genes13071288), 2022-07-21
Supplement: s1 [file s1]

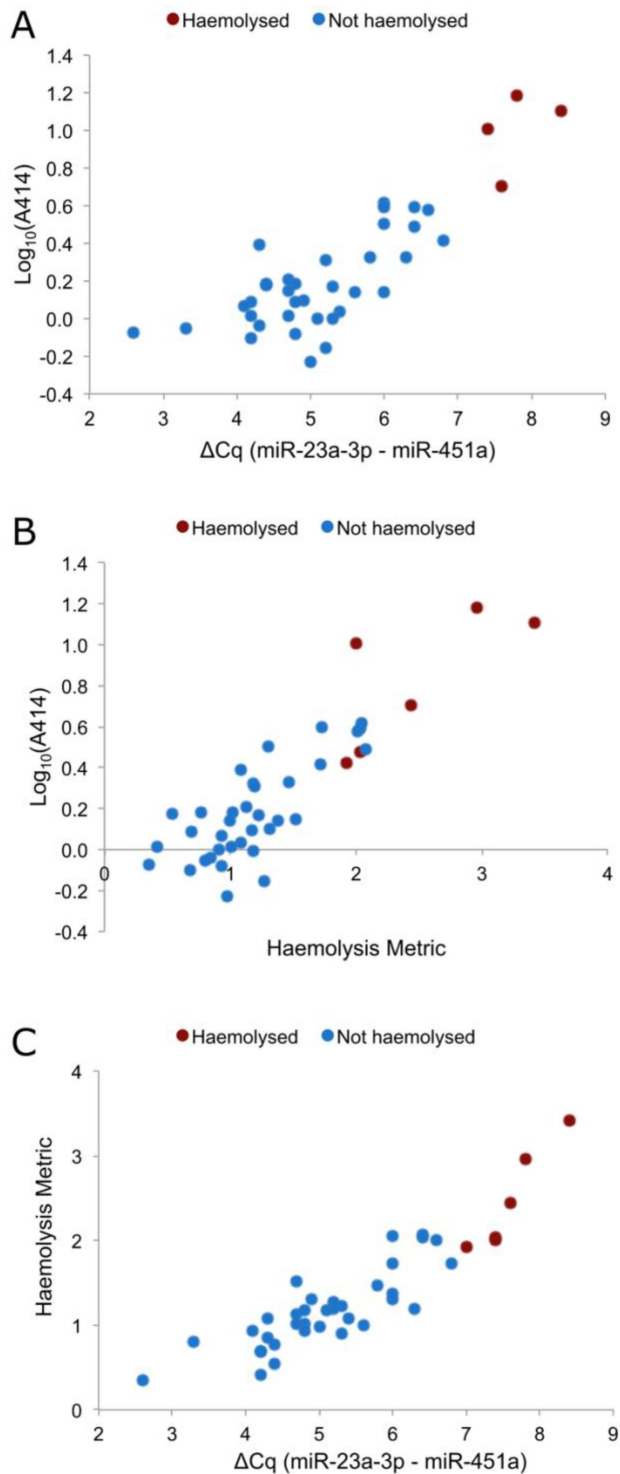

**Supplementary Figure S5. Comparison of the Spectrophotometry Absorbance: $\Delta\text{Cq}$  RT-qPCR (A), Spectrophotometry Absorbance:derived Haemolysis Metric (B), and derived Haemolysis Metric: $\Delta\text{Cq}$  RT-qPCR (C) methods for estimating haemolysis.** This was performed for a subset of 41 samples for which we had data from all three methods of haemolysis evaluation. The samples are colored according to the haemolysis classification from the  $\Delta\text{Cq}$  method. A clear correlation is present between all three methods and Haemolysis Metric described in this work was more highly correlated with both the Absorbance ( $R = 0.87$ ) and  $\Delta\text{Cq}$  ( $R=0.90$ ) methods than they are with each other ( $R=0.82$ ).
