# Supplementary material for: Haemolysis Detection in MicroRNA-Seq from Clinical Plasma Samples
Source: MDPI journal article supplement (doi:10.3390/genes13071288), 2022-07-21
Supplement: s1 [file s1]

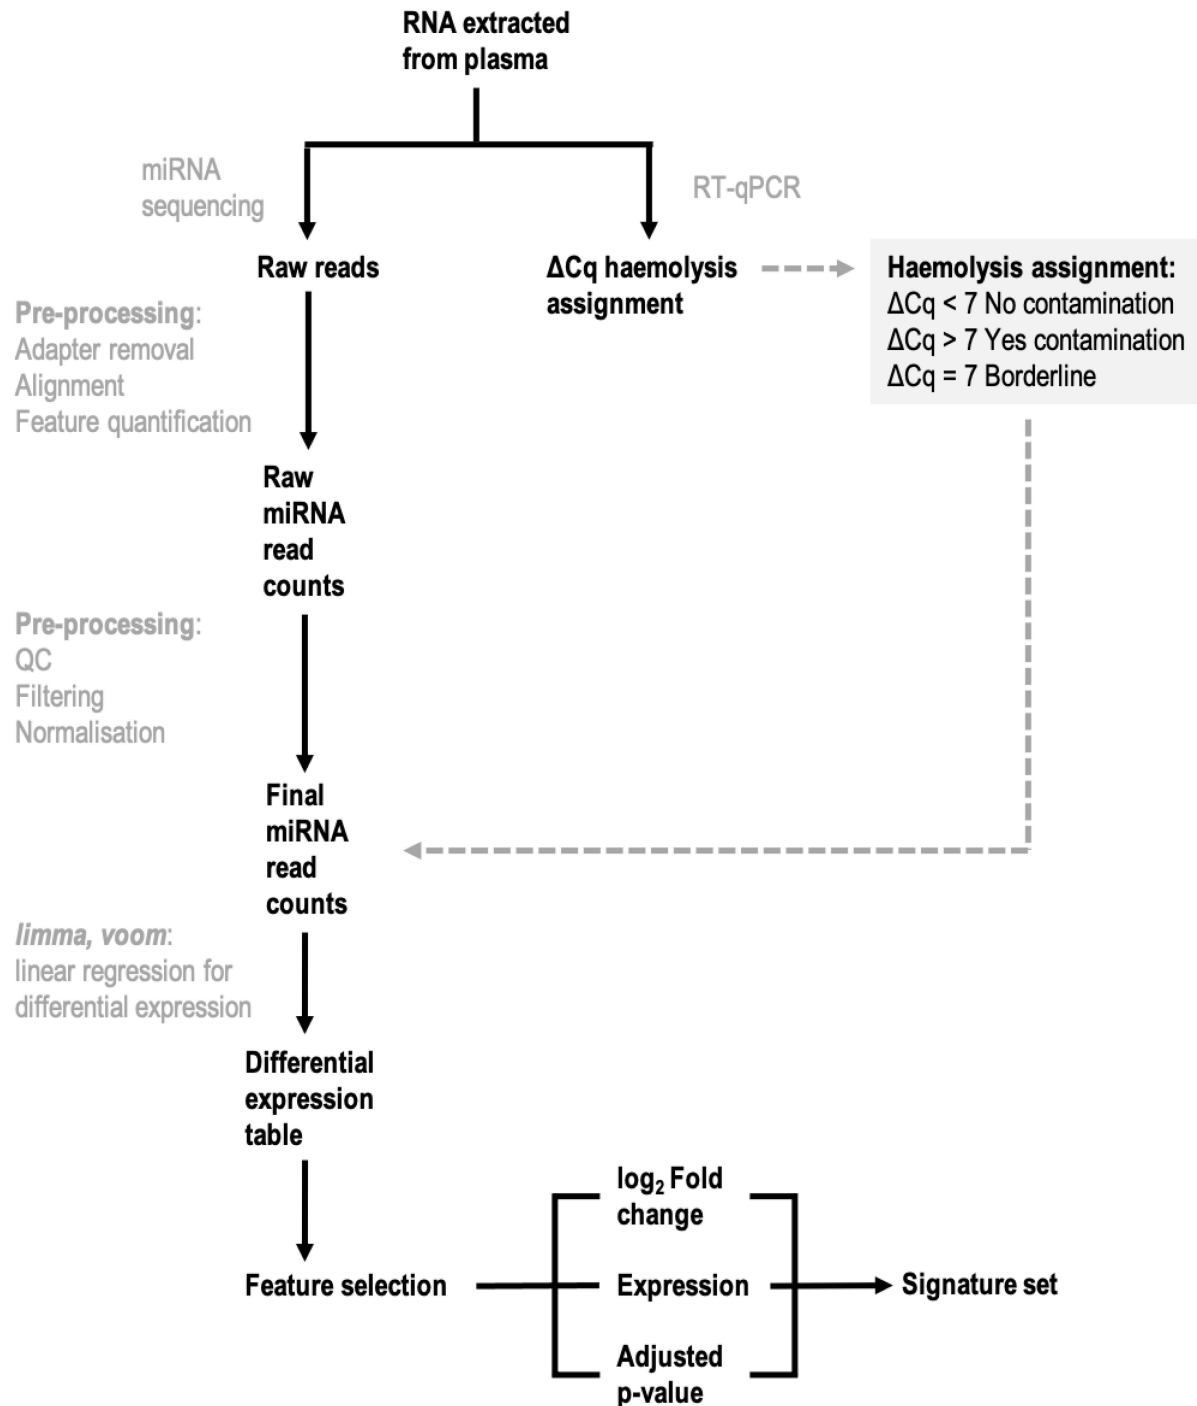

**Supplementary figure S1:** Haemolysis signature feature selection. Raw single-end reads from small RNA-seq libraries are pre-processed using a range of Unix- and python-based computational tools to quantify miRNA expression in each library. Data quality is ensured through quality control steps throughout the workflow. Concurrently with sequencing,  $\Delta Cq$  (miR-23a-miR-451) was assessed by RT-qPCR and incorporated into the differential expression analysis.
