# Supplementary material for: Haemolysis Detection in MicroRNA-Seq from Clinical Plasma Samples
Source: MDPI journal article supplement (doi:10.3390/genes13071288), 2022-07-21
Supplement: s1 [file s1]

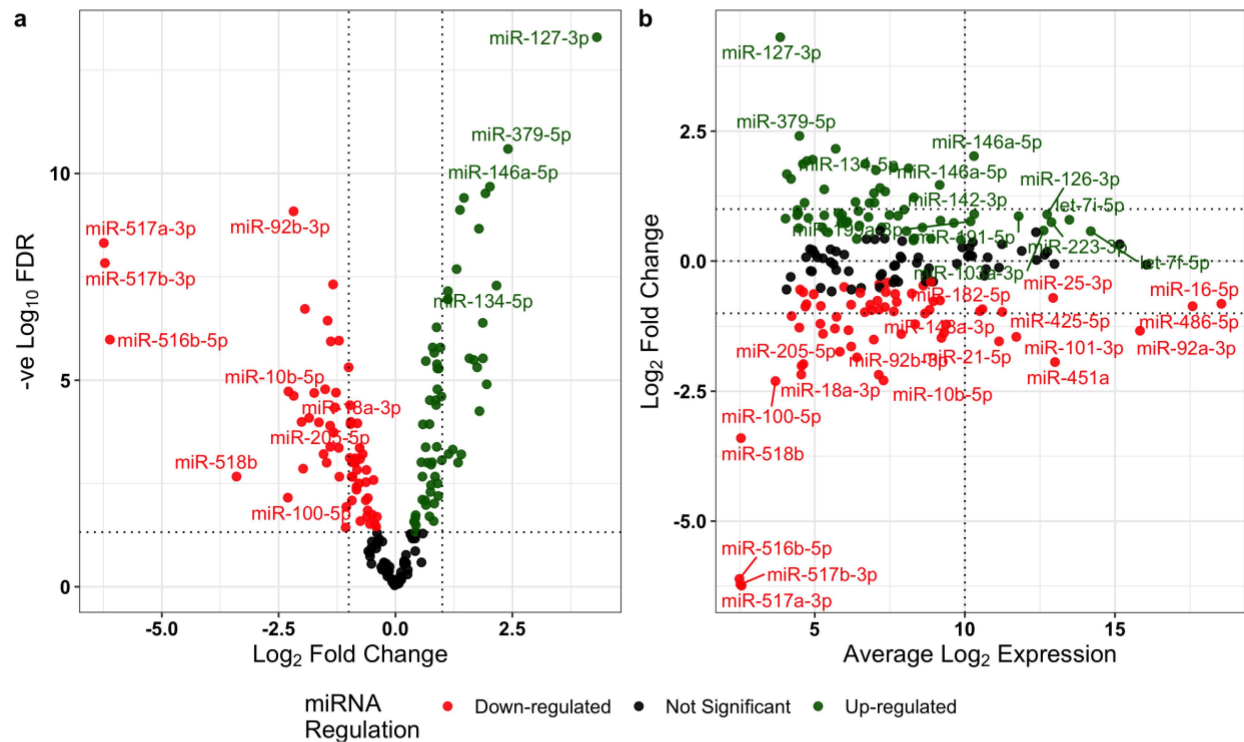

**Supplementary Figure S3:** (a) Volcano plot of differential expression between the pregnant and non-pregnant samples. Linear regression identified 104 miRNA (FDR < 0.05) which were more highly abundant in the pregnant population (red). Haemolysis Metric signature miRNAs are labelled (b) MA plot (M (log ratio) and A (mean average)) of  $\text{Log}_2$  fold change as a function of  $\text{Log}_2$  average expression indicates most miRNA have an average expression < 10  $\text{Log}_2$  CPM. Unsurprisingly, the most differentially expressed miRNA are miR-517a-3p, miR-517b-3p, miR-516b-5p, miR-518b, which are all members of the highly placenta associated chromosome 19 miRNA cluster.
