# Supplementary material for: Haemolysis Detection in MicroRNA-Seq from Clinical Plasma Samples
Source: MDPI journal article supplement (doi:10.3390/genes13071288), 2022-07-21
Supplement: s1 [file s1]

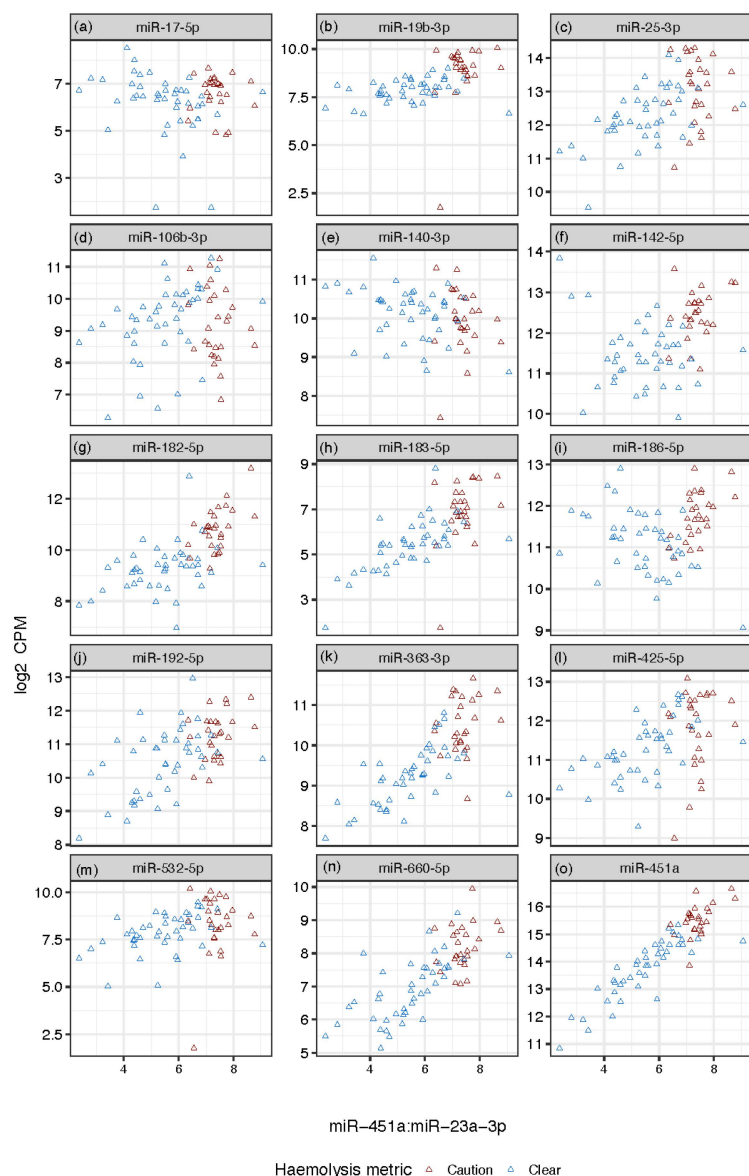

**Supplementary Figure S7.1:** Public dataset GSE118038 (prostate cancer study). Scatter plots of log<sub>2</sub> signature microRNA (miRNA) counts per million (CPM) as a function of a simple, proxy measure of haemolysis calculated by subtracting the log<sub>2</sub> CPM expression of the invariant miRNA miR-23a-3p from the red blood cell associated miR-451a. Signature miRNAs used in the calculation of the Haemolysis metric are presented in ascending numeric order from miR-17-5p (a) to miR-451a (o). Importantly, in this all-male experiment (n=70), the haemolysis signature miRNAs correlate strongly with the proxy measure of haemolysis. The publication associated with this data reported dysregulation of miR-30c-5p in prostate cancer (37). A further literature search identified miR-191-5p as dysregulated in prostate cancer with a previous study reporting this miRNA to be upregulated in patients with prostate cancer. In accordance with our method, this miRNA was excluded, as were miR-324-5p, miR-194-5p and miR-20b-5p that were found to have no expression profile in this dataset.



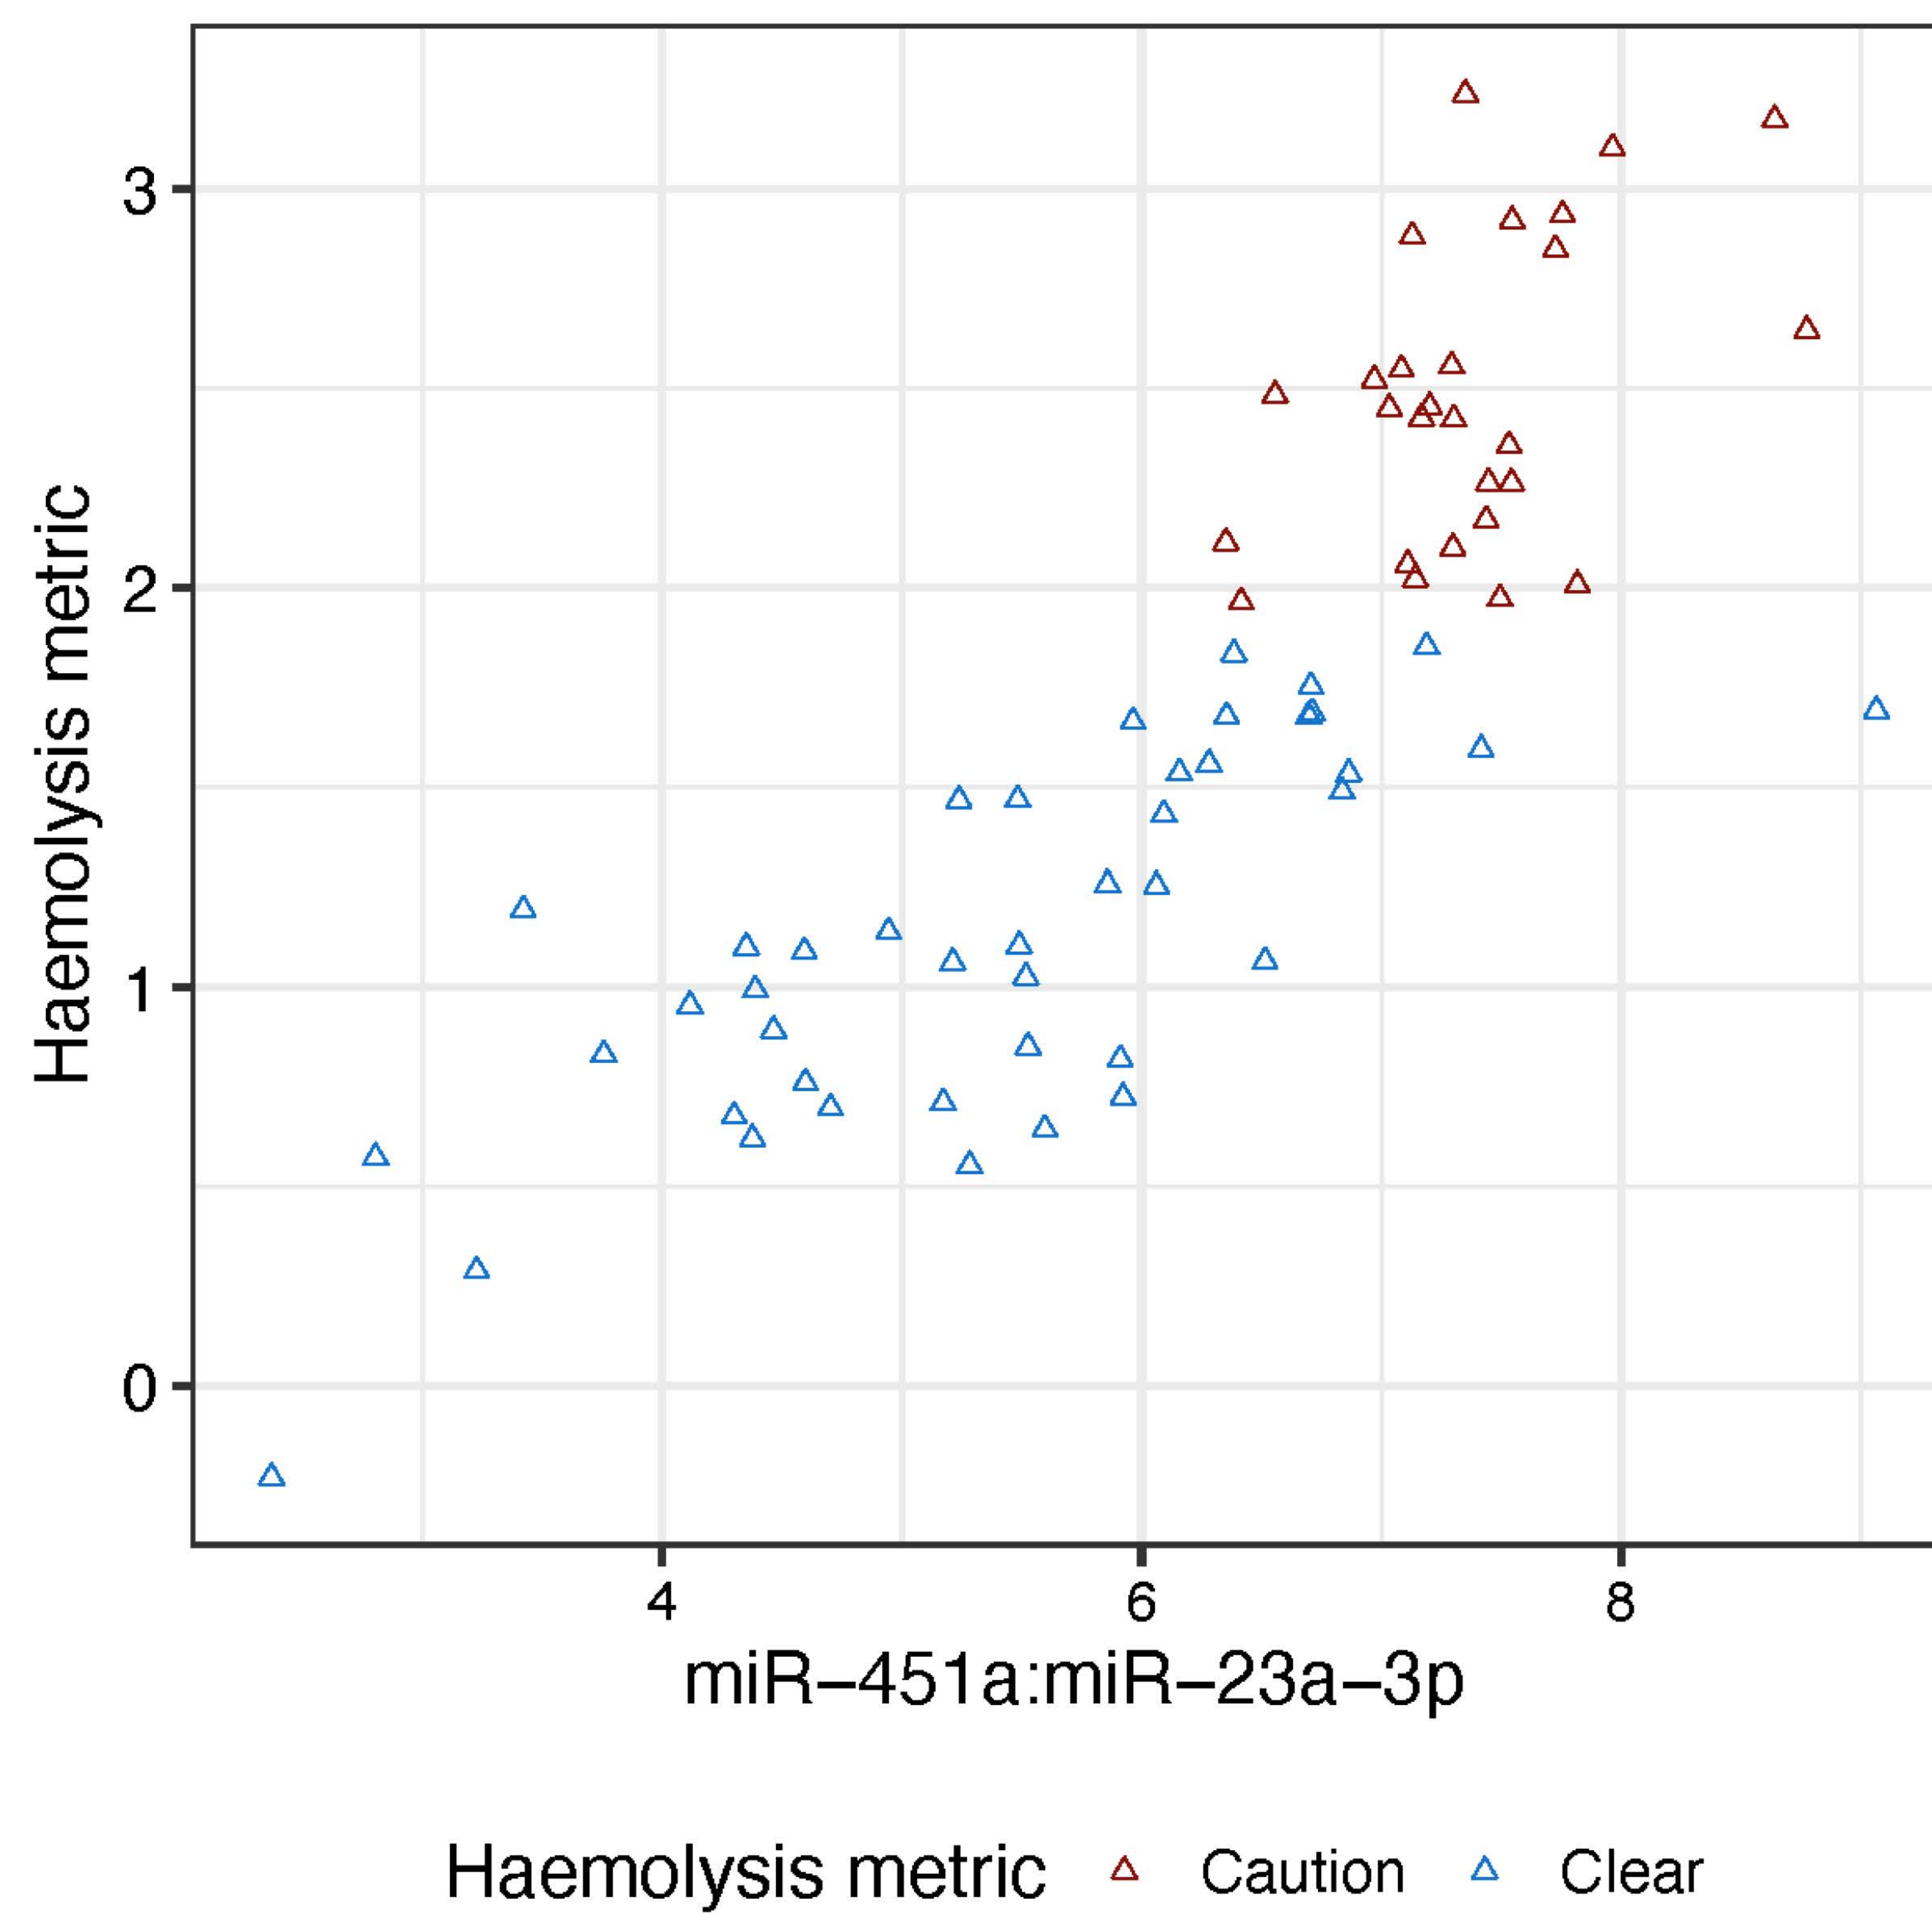

**Supplementary Figure s 7.2:** Public dataset GSE118038 (prostate cancer study). Scatter plot of the Haemolysis metric as a function of the proxy measure of haemolysis calculated by subtracting the  $\log_2$  CPM expression of the invariant miRNA miR-23a-3p from the red blood cell associated miR-451a. Both *in silico* measures of haemolysis show a strong correlation.

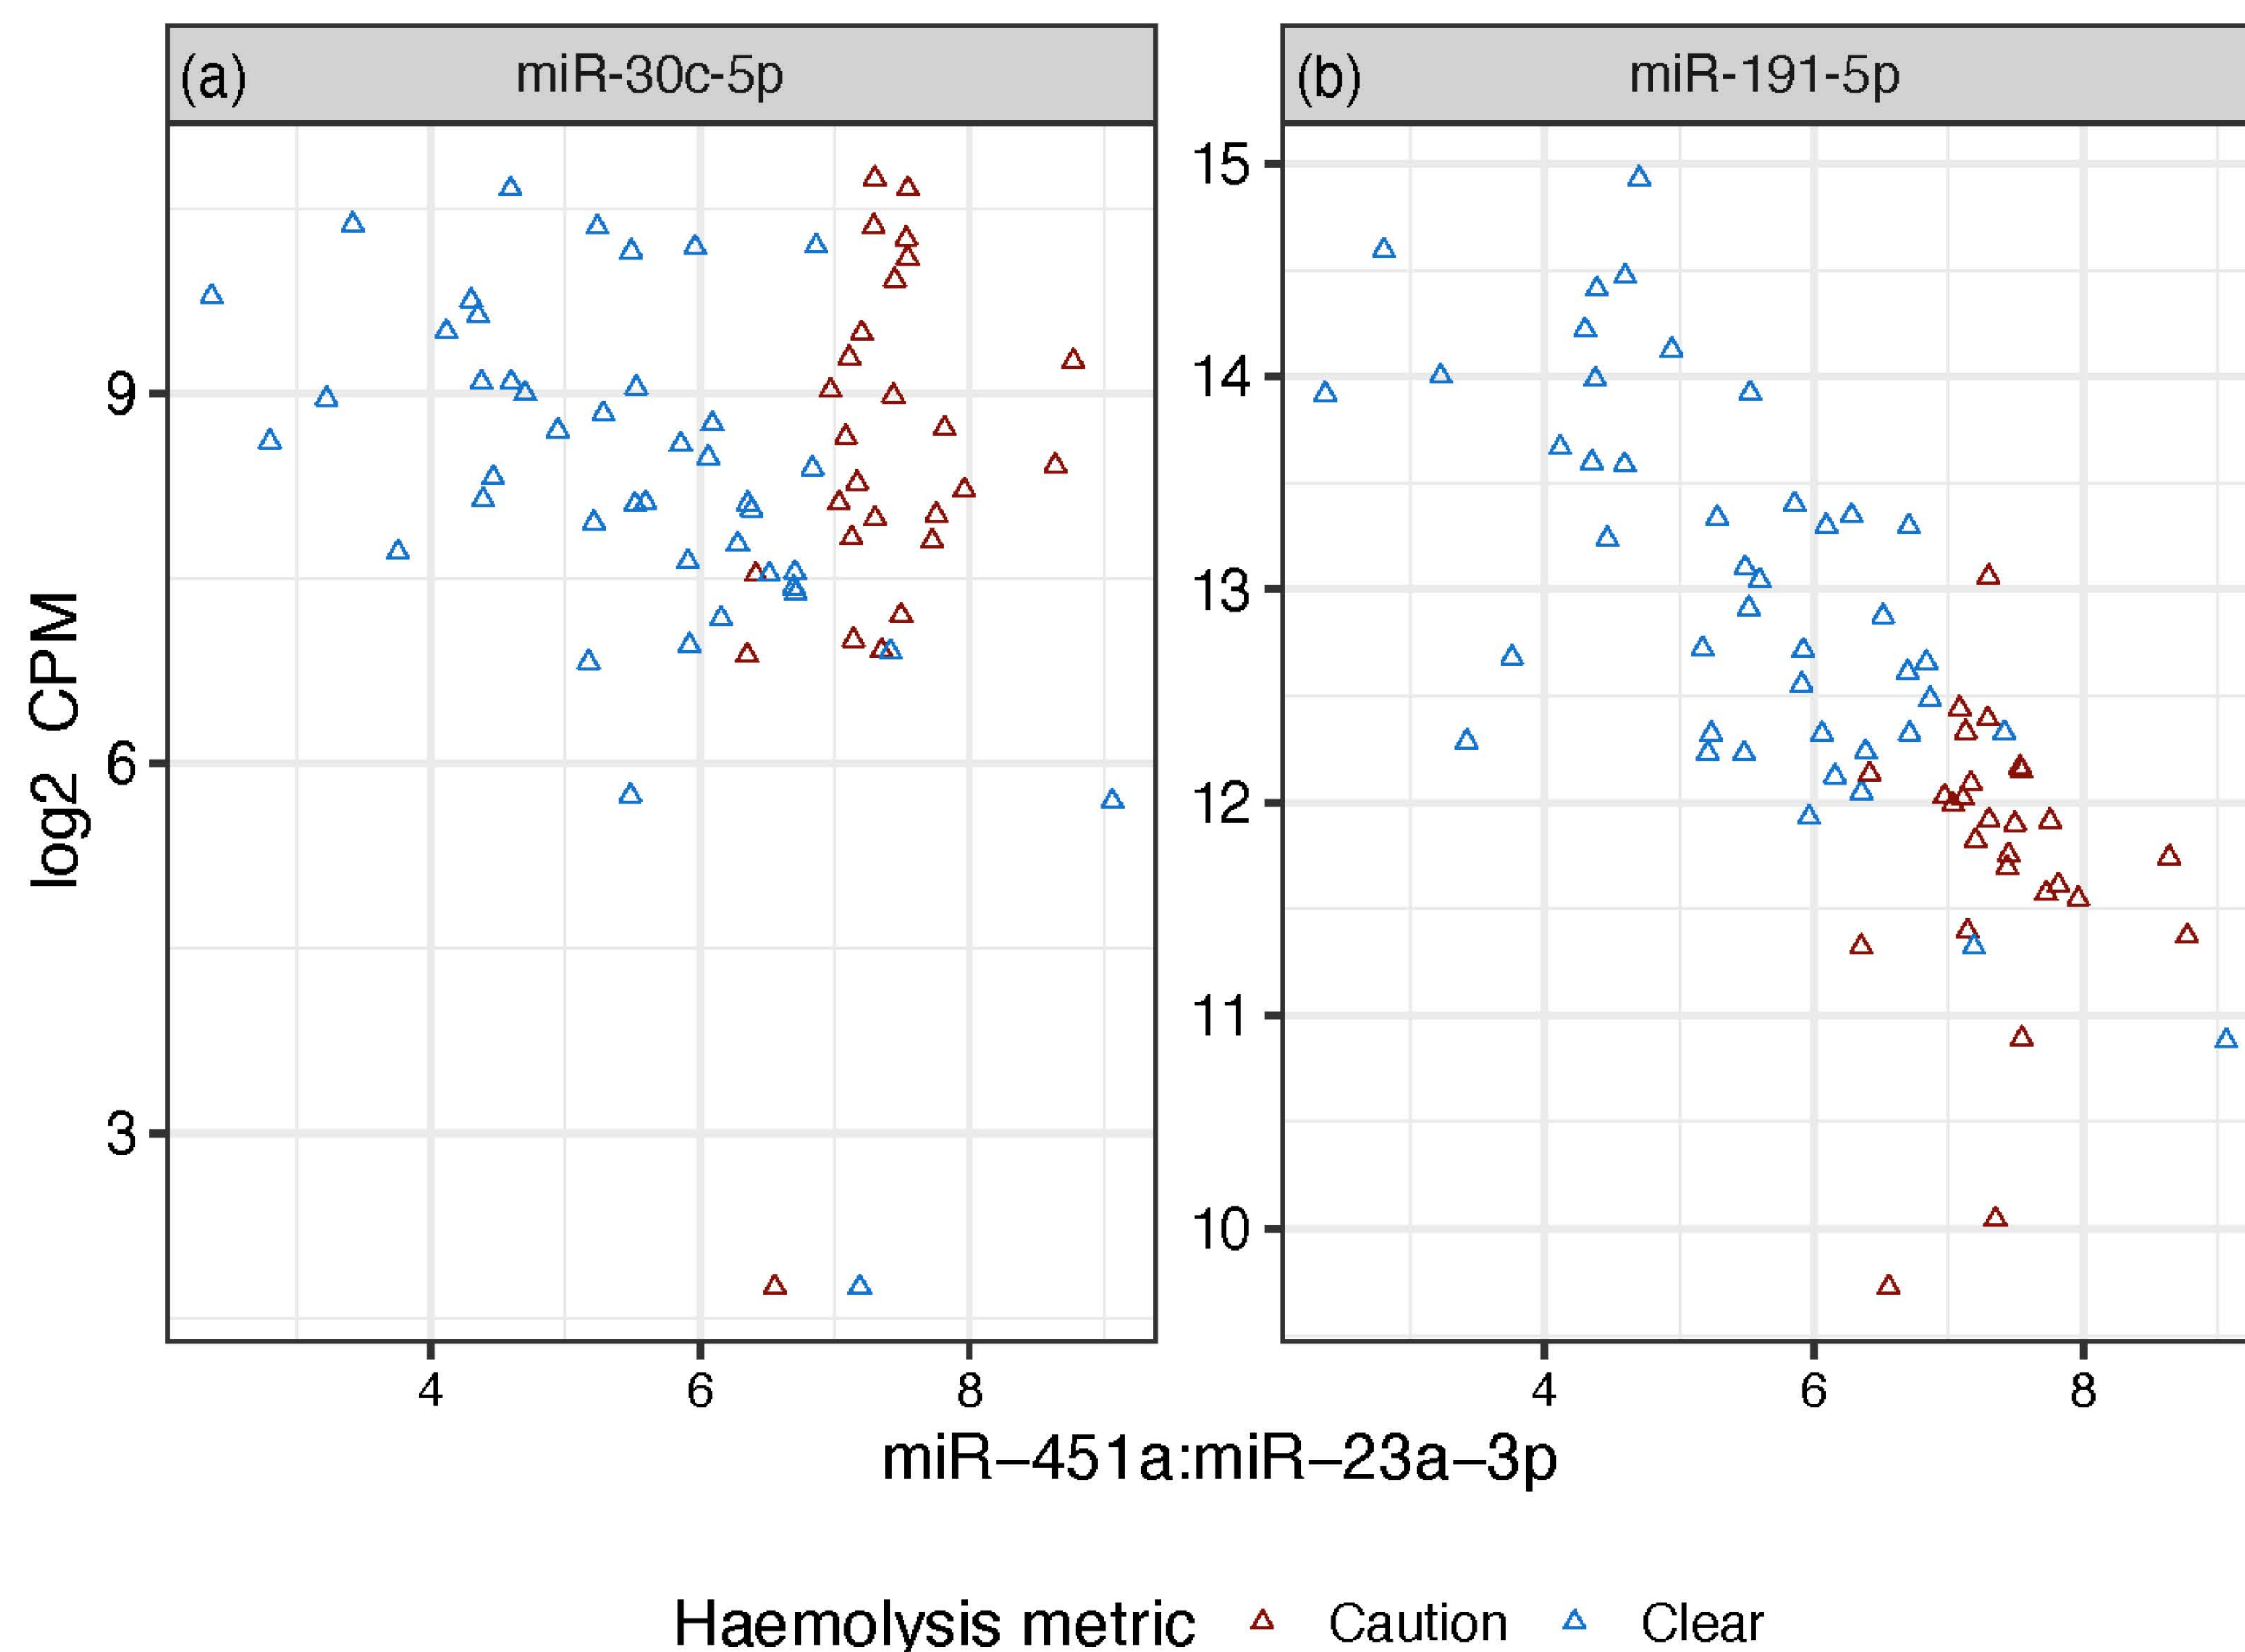

**Supplementary Figure s7.3:** Public dataset GSE118038 (prostate cancer study). Scatter plots of the two signature miRNAs dropped from calculation of the Haemolysis metric in accordance with our recommendations. As anticipated, neither miR-30c-5p (a) or miR-191-5p (b) have a strong positive correlation with the proxy measure of haemolysis calculated by subtracting the  $\log_2$  CPM expression of the invariant miRNA miR-23a-3p from the red blood cell associated miR-451a.
