# Supplementary material for: Haemolysis Detection in MicroRNA-Seq from Clinical Plasma Samples
Source: MDPI journal article supplement (doi:10.3390/genes13071288), 2022-07-21
Supplement: s1 [file s1]

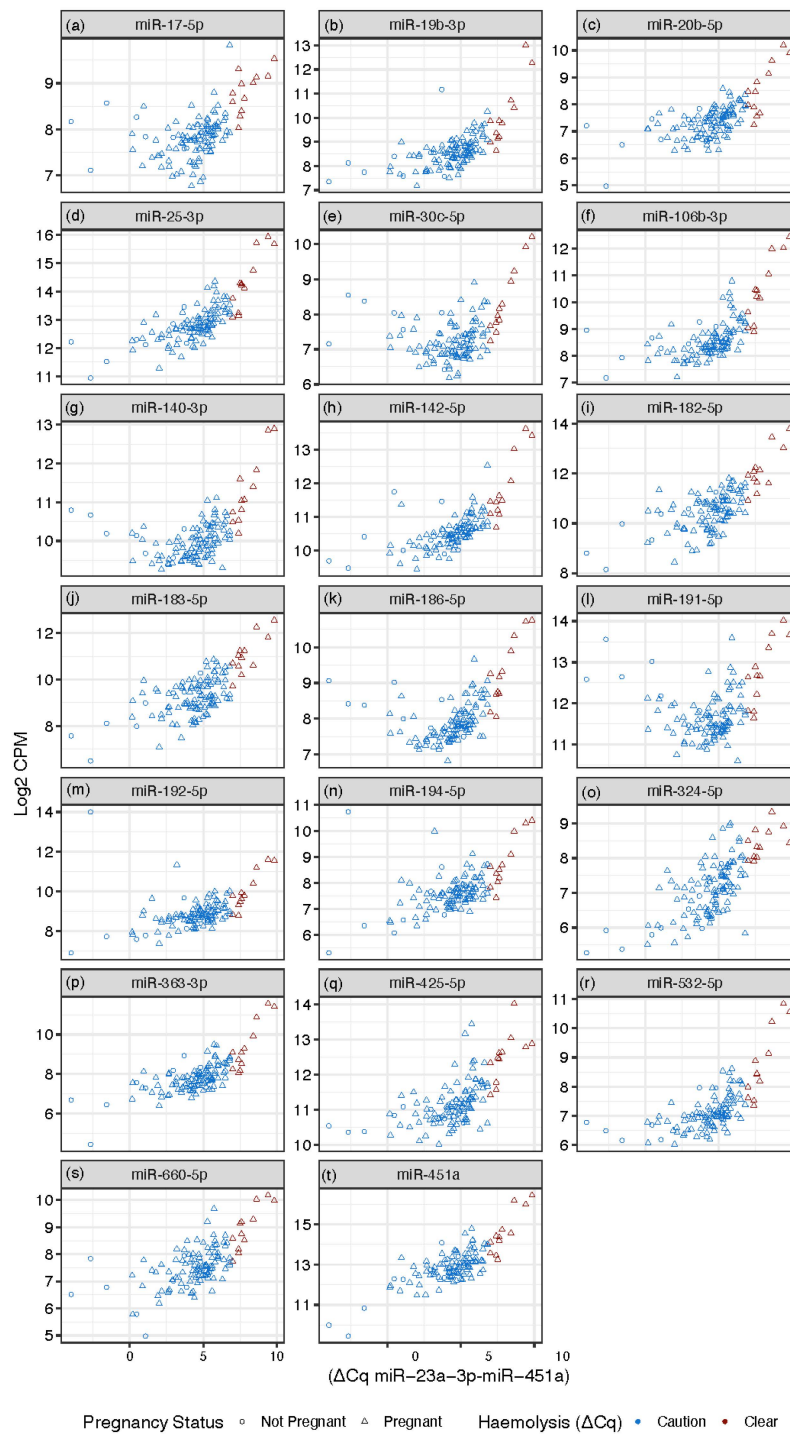

**Supplementary Figure S4.1:** Scatter plots of  $\log_2$  expression for all miRNAs in our 20 miRNA haemolysis signature set as a function of the  $\Delta Cq$  (miR-451a-miR-23a-3p) gold standard method of haemolysis detection. Signature miRNAs are presented in ascending numeric order from miR-17-5p (a) to miR-451a (t). For each miRNA there is a strong positive correlation between expression and the sample measure of  $\Delta Cq$  (miR-451a-miR-23a-3p).

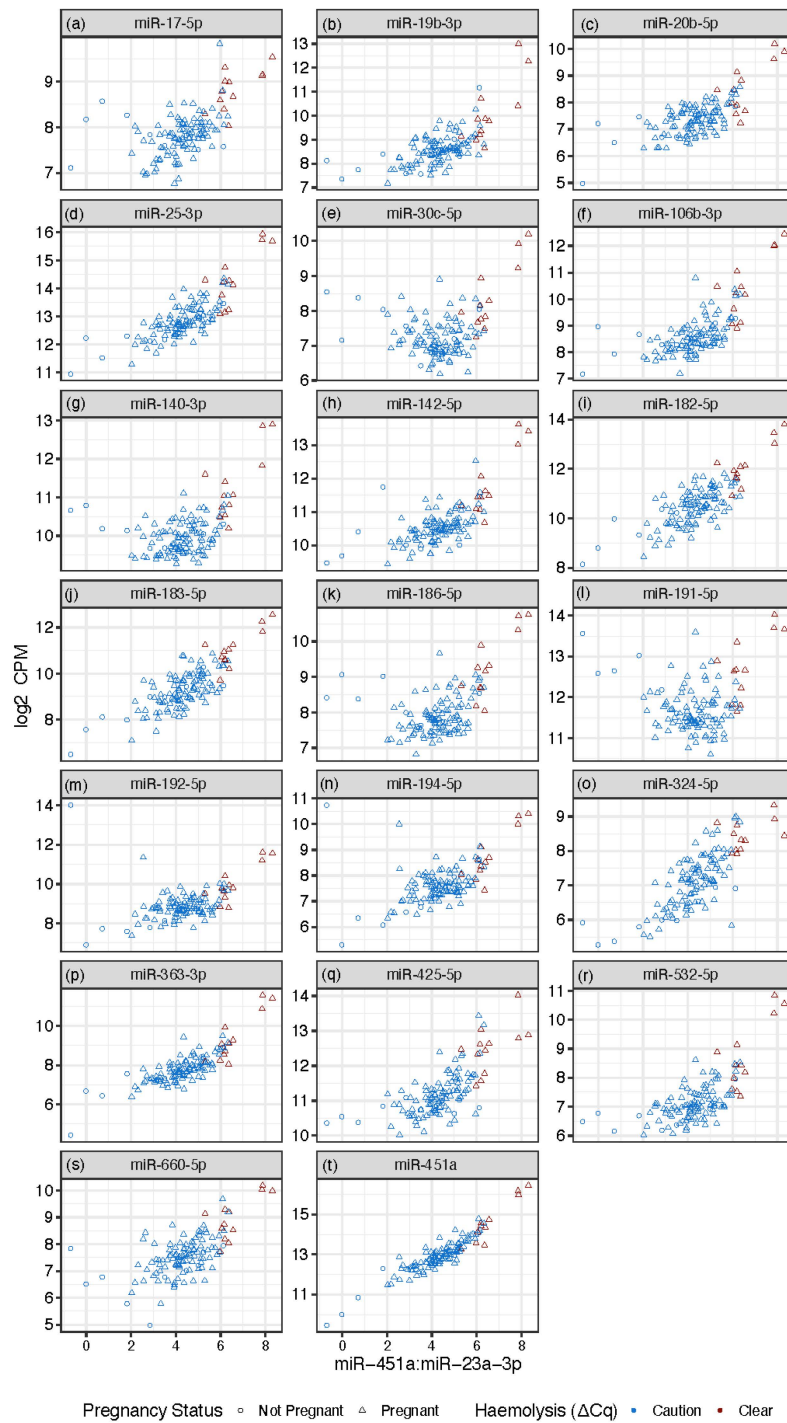

**Supplementary Figure S4.2:** Scatter plots of log<sub>2</sub> signature microRNA (miRNA) counts per million (CPM) as a function of a simple, proxy, measure of haemolysis calculated by subtracting the log<sub>2</sub> CPM expression of the invariant miRNA miR-23a-3p from the red blood cell associated miR-451a. Samples are coloured according to the measure of a haemolysis assayed using the ΔCq (miR-451a-miR-23a-3p) gold standard method. For all signature miRNAs there is a strong correlation between the expression of the signature miRNAs and the gold standard haemolysis metric.

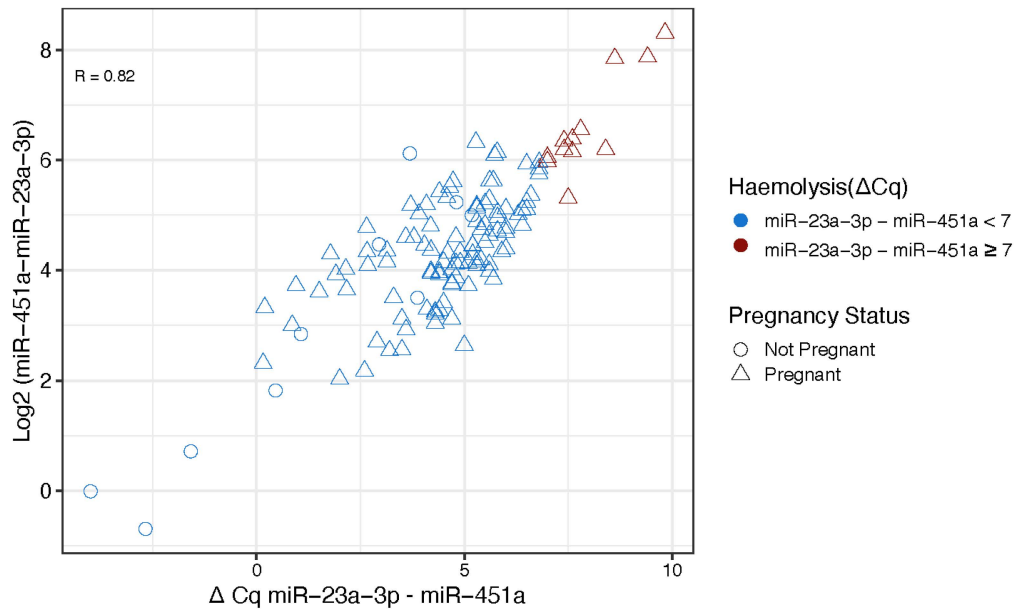

**Supplementary Figure S4.3:** Scatter plot of the simple, proxy, measure of haemolysis calculated by subtracting the  $\log_2$  CPM expression of the invariant miRNA miR-23a-3p from the red blood cell associated miR-451a as a function of the  $\Delta \text{Cq}$  (miR-451a-miR-23a-3p) gold standard method of haemolysis detection. We identified a strong, statistically significant ( $P\text{-Value} < 2.2 \times 10^{-16}$ ) correlation between these two measures of haemolysis.
