# Supplementary material for: Haemolysis Detection in MicroRNA-Seq from Clinical Plasma Samples
Source: MDPI journal article supplement (doi:10.3390/genes13071288), 2022-07-21
Supplement: s1 [file s1]

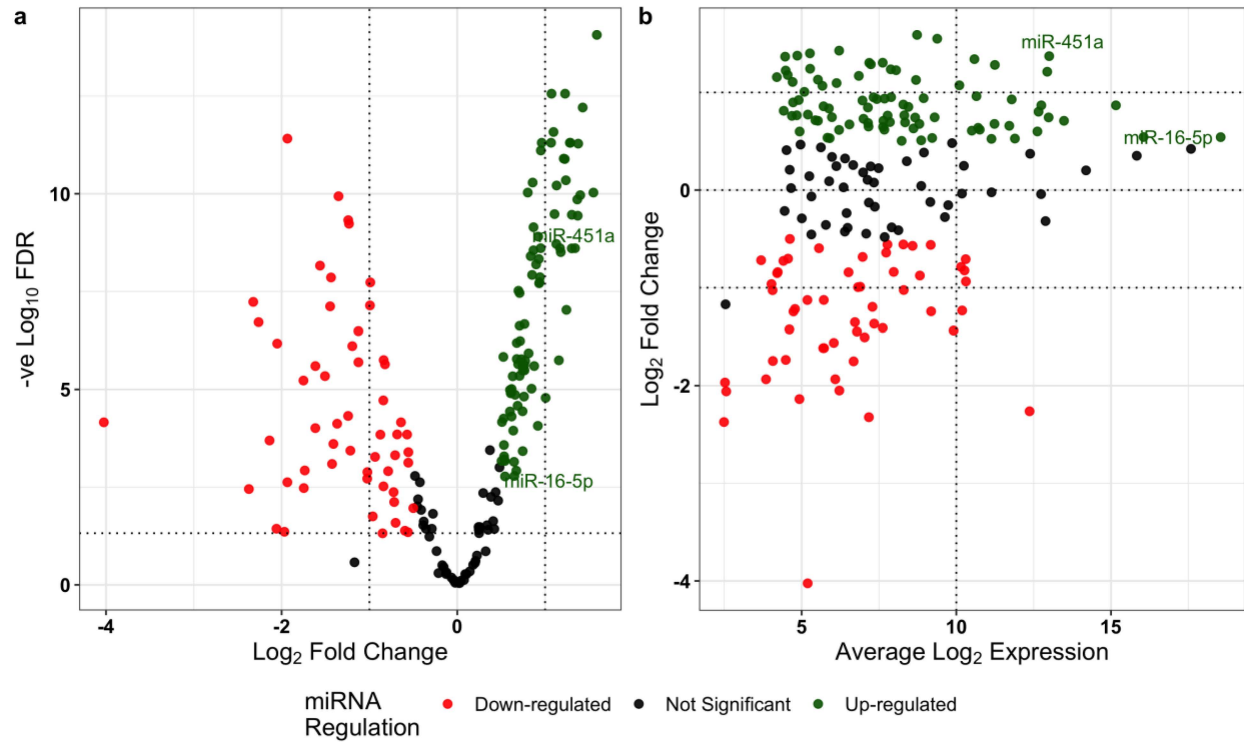

**Supplementary Figure S2:** (a) Volcano plot of differential expression. Linear regression identified 138 miRNA which were more highly abundant in haemolysed compared to non-haemolysed samples with  $\text{FDR} < 0.05$  (green). (b) MA plot (M (log ratio) and A (mean average)) of  $\text{Log}_2$  fold change as a function of  $\text{Log}_2$  average expression indicates most miRNA have an average expression  $< 10 \text{ Log}_2$  CPM. miR-451a and miR-16-5p, both highly red blood cell associated, are highly expressed and more abundant in the haemolysed group (green).
